# Supplementary material for: The “vicious circle” of chronic cough: the patient experience – qualitative synthesis
Source: PubMed Central journal article supplement — ERJ Open Res. 2023 May 22;9(3):00094-2023. doi: 10.1183/23120541.00094-2023 (PMC10204820; doi:10.1183/23120541.00094-2023), 2023-05-22
Supplement: 00094-2023.SUPPLEMENT2.pdf [file 00094-2023.SUPPLEMENT2.pdf]

## Supplementary File 2 – Search Strategy

|           |                                                                                                                                                                                                                                     |                                                                        |                                                                                                                                                        |       |
|-----------|-------------------------------------------------------------------------------------------------------------------------------------------------------------------------------------------------------------------------------------|------------------------------------------------------------------------|--------------------------------------------------------------------------------------------------------------------------------------------------------|-------|
|           | ( cough* (chronic* or sever* or idiopathic or refractory or unexplained or hypersensitiv* or persisten*) ) AND ( qualitative or interview* or "focus group*" or phenomonolog* or experience* or view* or opinion* or perspective* ) | Expanders - Apply equivalent subjects<br>Search modes - Boolean/Phrase | Interface - EBSCOhost Research Databases<br>Search Screen - Advanced Search<br>Database - MEDLINE;Academic Search Premier;CINAHL Complete;APA PsycInfo | 2,192 |
| <b>S4</b> | ( cough* (chronic* or sever* or idiopathic or refractory or unexplained or hypersensitiv* or persisten*) ) AND ( qualitative or interview* or "focus group*" or phenomonolog* or experience* or view* or opinion* or perspective* ) | Expanders - Apply equivalent subjects<br>Search modes - Boolean/Phrase | Interface - EBSCOhost Research Databases<br>Search Screen - Advanced Search<br>Database - MEDLINE                                                      | 1,199 |
| <b>S3</b> | ( cough* (chronic* or sever* or idiopathic or refractory or unexplained or hypersensitiv* or persisten*) ) AND ( qualitative or interview* or "focus group*" or phenomonolog* or experience* or view* or opinion* or perspective* ) | Expanders - Apply equivalent subjects<br>Search modes - Boolean/Phrase | Interface - EBSCOhost Research Databases<br>Search Screen - Advanced Search<br>Database - APA PsycInfo                                                 | 48    |
| <b>S2</b> | ( cough* (chronic* or sever* or idiopathic or refractory or unexplained or hypersensitiv* or persisten*) ) AND ( qualitative or interview* or "focus group*" or phenomonolog* or experience* or view* or opinion* or perspective* ) | Expanders - Apply equivalent subjects<br>Search modes - Boolean/Phrase | Interface - EBSCOhost Research Databases<br>Search Screen - Advanced Search<br>Database - Academic Search Premier                                      | 614   |
| <b>S1</b> | ( cough* (chronic* or sever* or idiopathic or refractory or unexplained or hypersensitiv* or persisten*) ) AND ( qualitative or interview* or "focus group*" or phenomonolog* or experience* or view* or opinion* or perspective* ) | Expanders - Apply equivalent subjects<br>Search modes - Boolean/Phrase | Interface - EBSCOhost Research Databases<br>Search Screen - Advanced Search<br>Database - CINAHL Complete                                              | 331   |
