# Supplementary material for: The “vicious circle” of chronic cough: the patient experience – qualitative synthesis
Source: PubMed Central journal article supplement — ERJ Open Res. 2023 May 22;9(3):00094-2023. doi: 10.1183/23120541.00094-2023 (PMC10204820; doi:10.1183/23120541.00094-2023), 2023-05-22
Supplement: 00094-2023.SUPPLEMENT3.pdf [file 00094-2023.SUPPLEMENT3.pdf]

Supplementary File 3

| <b>CASP TABLE</b>                                                                              | <b>Wright et al., 2022</b> | <b>Vernon et al., 2009</b> | <b>Hulme et al., 2019</b> | <b>Kum et al., 2022</b> | <b>Sinha et al., 2018</b> | <b>Ueda et al., 2022</b> |
|------------------------------------------------------------------------------------------------|----------------------------|----------------------------|---------------------------|-------------------------|---------------------------|--------------------------|
| <b>1. Was there a clear statement of the aims of the research?</b>                             | Y                          | N                          | Y                         | Y                       | Y                         | Y                        |
| <b>2. Is a qualitative methodology appropriate?</b>                                            | Y                          | Y                          | Y                         | Y                       | Y                         | Y                        |
| <b>3. Was the research design appropriate to address the aims of the research?</b>             | Y                          | Y                          | Y                         | Y                       | Y                         | Y                        |
| <b>4. Was the recruitment strategy appropriate to the aims of the research?</b>                | Y                          | Y                          | U                         | Y                       | Y                         | Y                        |
| <b>5. Was the data collected in a way that addressed the research issue?</b>                   | Y                          | Y                          | Y                         | Y                       | Y                         | Y                        |
| <b>6. Has the relationship between researcher and participants been adequately considered?</b> | Y                          | N                          | Y                         | Y                       | Y                         | Y                        |
| <b>7. Have ethical issues been taken into consideration?</b>                                   | U                          | U                          | Y                         | Y                       | Y                         | Y                        |
| <b>8. Was the data analysis sufficiently rigorous?</b>                                         | Y                          | Y                          | Y                         | Y                       | Y                         | Y                        |
| <b>9. Is there a clear statement of findings?</b>                                              | Y                          | Y                          | Y                         | Y                       | Y                         | Y                        |
| <b>10. How valuable is the research?</b>                                                       | Y                          | Y                          | Y                         | Y                       | Y                         | Y                        |

KEY: Y= Criterion Satisfied N = Criterion not satisfied U = Unclear if criterion satisfied
